# Supplementary material for: Low loss and excellent stability of Zn 0.7 Mg 0.3 TiO 3 ceramics with V 2 O 5 –TiO 2 addition for application in low-temperature co-fired ceramic technology
Source: Royal Society of Chemistry journal article supplement (doi:10.1039/d4tc04698f), 2025-01-01
Supplement: d4tc04698f1.pdf [file d4tc04698f1.pdf]

## Low loss and excellent stability of $\text{Zn}_{0.7}\text{Mg}_{0.3}\text{TiO}_3$ ceramics added $\text{V}_2\text{O}_5$ - $\text{TiO}_2$ for implementing low-temperature co-fired ceramic technology

Liangchen Fan,<sup>a</sup> Yulong Liao,<sup>a</sup> Yuanxun Li,<sup>a</sup> Fuyu Li,<sup>a</sup> Jie Li,<sup>a</sup> Wenhao Chen,<sup>b</sup> Qiang Zhao,<sup>a\*</sup>

<sup>a</sup> State Key Laboratory of Electronic Thin Films and Integrated Devices, University of Electronic Science

and Technology of China, Chengdu 611731, P. R. China. E-mail:

qzh@uestc.edu.cn

<sup>b</sup> Southwest China Institute of Electronic Technology, Chengdu 610036, China.

### Results

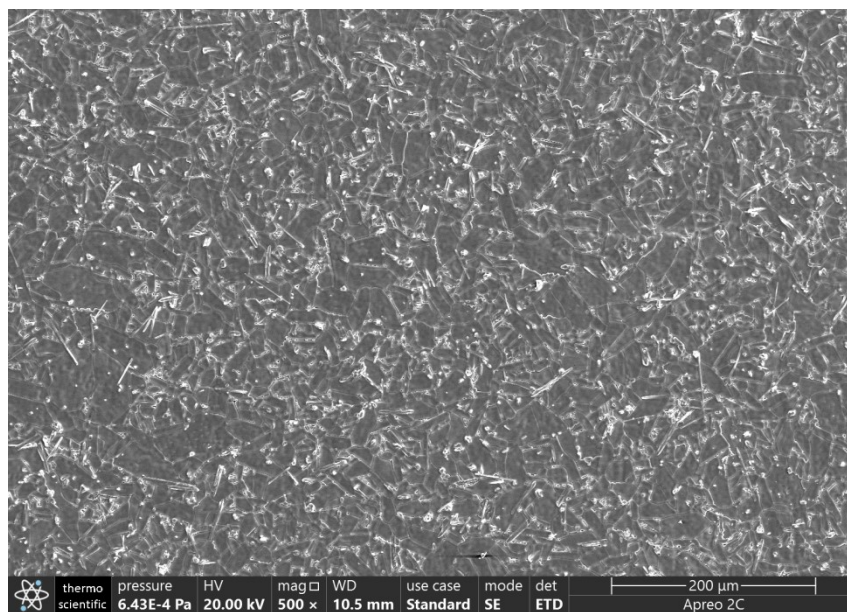

**SFig. 1** SEM image of the  $\text{Zn}_{0.7}\text{Mg}_{0.3}\text{TiO}_3$  ceramics.

**Table S1**

The dielectric properties of the  $\text{Zn}_{0.7}\text{Mg}_{0.3}\text{TiO}_3$  ceramic sintered at 1150°C for 4h.

| Sample                                       | $\epsilon_r$ | $Q \times f$ | $\tau_f$     |
|----------------------------------------------|--------------|--------------|--------------|
| $\text{Zn}_{0.7}\text{Mg}_{0.3}\text{TiO}_3$ | 21.714       | 48486.6      | -16.31204951 |
